# Supplementary material
Source: PubMed Central journal article supplement (PMC3067400)
Supplement: supp_10_2_198__1.pdf [file supp_10_2_198__1.pdf]

Figure S1

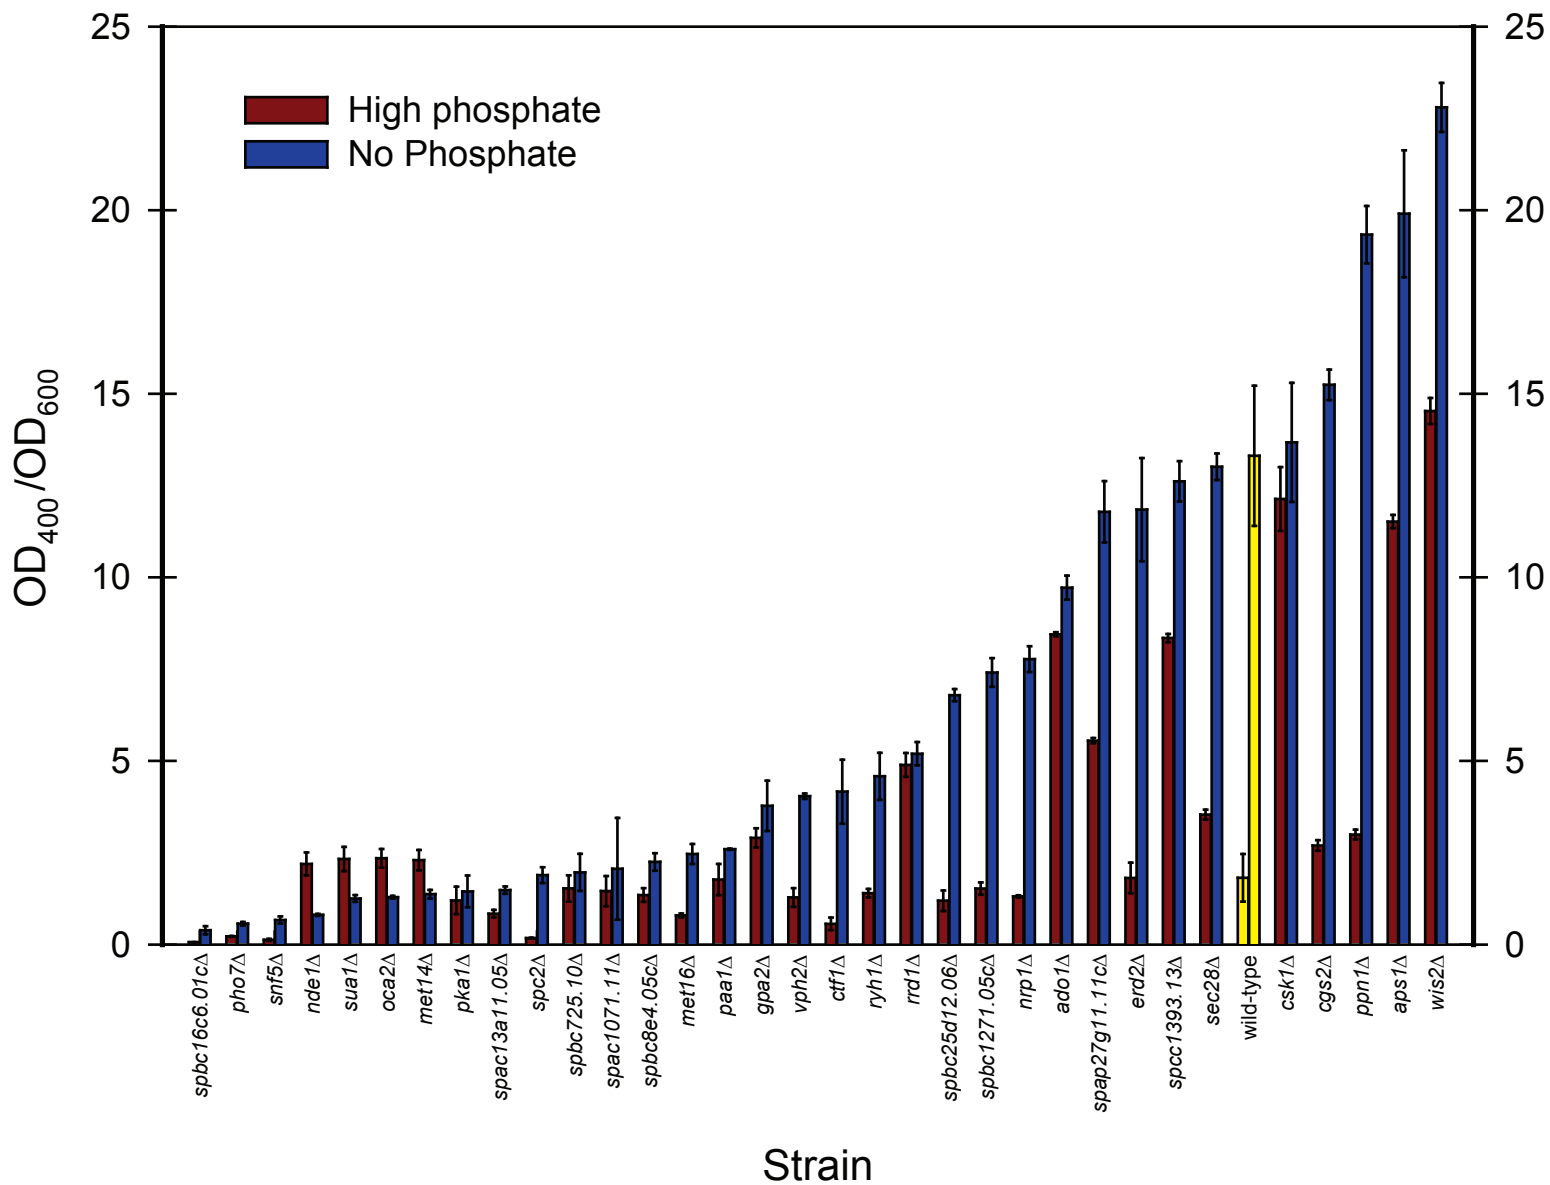

Figure S1. Histogram of acid-phosphatase activity. Mutants' phosphatase activity was measured using PNPP as a substrate after 16 hours of growth in high- and no-phosphate conditions. The strains were ordered by their phosphatase activity during phosphate starvation from least to most activity. All tests were performed in triplicate and the error is SE. Wild-type (DP3) is shown in yellow.

TABLE S1. All mutants scored.

| <i>S. pombe</i><br>Systematic<br>Name | Product                                                                                                                                                                                                                    |
|---------------------------------------|----------------------------------------------------------------------------------------------------------------------------------------------------------------------------------------------------------------------------|
| Uninducible screen                    |                                                                                                                                                                                                                            |
| SPAC4G8.11c                           | F1-F0 ATPase assembly protein; similar to <i>S. cerevisiae</i> YLR393W                                                                                                                                                     |
| SPAC13A11.05                          | peptidase family M17; no apparent <i>S. cerevisiae</i> ortholog                                                                                                                                                            |
| SPBC106.10                            | cAMP-dependent protein kinase catalytic subunit Pka1 (PMID 8144551); non-essential (PMID 12618370); similar to <i>S. cerevisiae</i> YJL164C and YPL203W and YKL166C                                                        |
| SPBC530.01                            | GTPase activating protein (predicted); TBC domain protein; target Rab-like GTPase (predicted); similar to <i>S. cerevisiae</i> YOR070C                                                                                     |
| SPBC1711.14                           | meiotic recombination protein Rec15; no apparent orthologs                                                                                                                                                                 |
| SPBC3B9.11c                           | mRNA cleavage and polyadenylation specificity factor complex subunit Ctf1; rrm RNA recognition motif; similar to <i>S. cerevisiae</i> YGL044C                                                                              |
| SPBC1D7.04                            | RNA annealing factor Mlo3; similar to <i>S. cerevisiae</i> YDR381W; non-essential (PMID 15990877); rrm RNA recognition motif                                                                                               |
| SPAC3H8.09c                           | poly(A) binding protein; rrm RNA recognition motif; similar to <i>S. cerevisiae</i> YPL190C                                                                                                                                |
| SPAC17H9.04c                          | RNA-binding protein; zinc finger protein; zf-ranBP; rrm RNA recognition motif; similar to <i>S. cerevisiae</i> YDL167C                                                                                                     |
| SPAC2F7.08c                           | chromatin remodeling complex subunit Snf5 (predicted); similar to <i>S. cerevisiae</i> YBR289W                                                                                                                             |
| SPAC1782.11                           | adenylyl-sulfate kinase (predicted); similar to <i>S. cerevisiae</i> YKL001C                                                                                                                                               |
| SPAC1D4.01                            | sequence orphan                                                                                                                                                                                                            |
| SPBC1271.14                           | glutamate N-acetyltransferase (predicted); non-essential (PMID 12618370); similar to <i>S. cerevisiae</i> YMR062C                                                                                                          |
| SPAC1782.08c                          | exonuclease Rex3 (predicted); similar to <i>S. cerevisiae</i> YLR107W                                                                                                                                                      |
| SPAC16C9.07                           | serine/threonine protein kinase Ppk5 (predicted); non-essential (PMID 15821139); related to <i>S. pombe</i> pom1; DYRK family; no apparent orthologs                                                                       |
| SPAC31G5.17c                          | 40S ribosomal protein S10; similar to <i>S. cerevisiae</i> YOR293W and YMR230W                                                                                                                                             |
| SPBC13E7.03c                          | post-transcriptional regulator Vts1 (predicted); RNA hairpin binding protein (predicted); SAM domain (sterile alpha motif); similar to <i>S. cerevisiae</i> YOR359W                                                        |
| SPAC3A11.07                           | NADH dehydrogenase; similar to <i>S. cerevisiae</i> YMR145C and YDL085W and YML120C                                                                                                                                        |
| SPBC14C8.05c                          | glucan- $\alpha$ -1,4-glucosidase; glycosyl hydrolase family 15; expressed during sporulation; meiotic expression upregulated; predicted N-terminal signal sequence; similar to <i>S. cerevisiae</i> YIL099W               |
| SPBC1604.20c                          | kinesin-like protein Tea2; kinesin family; KIP2 subfamily; similar to <i>S. cerevisiae</i> YPL155C                                                                                                                         |
| SPAC9.02c                             | N-acetyltransferase; GNAT family; arylalkylamine N-acetyltransferase (predicted); similar to <i>S. cerevisiae</i> YDR071C                                                                                                  |
| SPAC1093.01                           | PPR domains; predicted N-terminal signal sequence; no apparent orthologs (cannot be distinguished)                                                                                                                         |
| SPBC1198.14c                          | fructose-1,6-bisphosphatase Fbp1 (PMID 2157626); similar to <i>S. cerevisiae</i> YLR377C                                                                                                                                   |
| SPBC25H2.03                           | HEAT repeat; similar to <i>S. cerevisiae</i> YLR386W                                                                                                                                                                       |
| SPBC27B12.11c                         | transcription factor (predicted); zinc finger protein; zf-fungal Zn(2)-Cys(6) binuclear cluster domain; no apparent orthologs (cannot be distinguished)                                                                    |
| SPBC27.08c                            | sulfate adenylyltransferase (ATP) (PMID 14723223); similar to <i>S. cerevisiae</i> YJR010W                                                                                                                                 |
| SPBC29A3.02c                          | phosphoribosyl-AMP cyclohydrolase/phosphoribosyl-ATP pyrophosphohydrolase His07; similar to <i>S. cerevisiae</i> YCL030C; similarity to YCL030C is at the N-term, <i>S. pombe</i> his2 is similar to YCL030C at the C-term |

---

|               |                                                                                                                                                                                                                                                                               |
|---------------|-------------------------------------------------------------------------------------------------------------------------------------------------------------------------------------------------------------------------------------------------------------------------------|
| SPBC8E4.05c   | 3-carboxy-cis,cis-muconate cycloisomerase (predicted); no apparent <i>S. cerevisiae</i> ortholog                                                                                                                                                                              |
| SPBC2D10.05   | glucan 1,3-beta-glucosidase; glycosyl hydrolase family 5; similar to <i>S. cerevisiae</i> YBR056W                                                                                                                                                                             |
| SPBP4G3.02    | acid phosphatase Pho1 (PMID 4092931); predicted N-terminal signal sequence; GPI anchored protein (predicted) (PMID 12845604); glycoprotein (PMID 2381421); similar to <i>S. cerevisiae</i> YAR071W and YHR215W and YDL024C and YBR093C and YBR092C; localization cell         |
| SPBC30D10.16  | phrenate dehydratase (predicted); similar to <i>S. cerevisiae</i> YNL316C                                                                                                                                                                                                     |
| SPCC1739.10   | conserved fungal protein; similar to <i>S. pombe</i> SPAC13G7.04c (paralog); 3 predicted transmembrane helices; similar to <i>S. cerevisiae</i> YOL019W and YFR012W and YMR063W; predicted N-terminal signal sequence                                                         |
| SPAC17A5.16   | conserved eukaryotic protein; no apparent <i>S. cerevisiae</i> ortholog                                                                                                                                                                                                       |
| SPBC428.05c   | argininosuccinate synthase (predicted); non- essential (PMID 12618370); similar to <i>S. cerevisiae</i> YOL058W                                                                                                                                                               |
| SPCC1672.04c  | mitochondrial copper ion transport protein; CHCH domain; similar to <i>S. cerevisiae</i> YLL018C-A                                                                                                                                                                            |
| SPBC24C6.05   | coatamer epsilon subunit (predicted); TPR repeat protein (inferred from context); similar to <i>S. cerevisiae</i> YIL076W                                                                                                                                                     |
| SPCC1739.06c  | uroporphyrin methyltransferase (predicted); similar to <i>S. cerevisiae</i> YKR069W                                                                                                                                                                                           |
| SPCC285.09c   | cAMP-specific phosphodiesterase Cgs2; similar to <i>S. cerevisiae</i> YGL248W                                                                                                                                                                                                 |
| SPAC1071.04c  | signal peptidase subunit (predicted); 2 predicted transmembrane helices; similar to <i>S. cerevisiae</i> YML055W                                                                                                                                                              |
| SPAC4C5.02c   | GTPase Ryh1; similar to <i>S. cerevisiae</i> YLR262C                                                                                                                                                                                                                          |
| SPCC16A11.15c | sequence orphan                                                                                                                                                                                                                                                               |
| SPAC13D6.02c  | zinc finger protein; zf-CCHC type (zinc knuckle) (7); similar to <i>S. cerevisiae</i> YNL255C                                                                                                                                                                                 |
| SPAC13G6.10c  | conserved fungal protein; serine-rich protein; glycoprotein (predicted); predicted N-terminal signal sequence; similar to <i>N. crassa</i> B24p11.210; no apparent <i>S. cerevisiae</i> ortholog                                                                              |
| SPAPB1A10.03  | Tap cofactor p15; NTF2 domain; non-essential (PMID 14963046); similar to <i>S. cerevisiae</i> YKL186C; ouble mutant rae1delta/nxt1delta lethal (PMID 14963046)                                                                                                                |
| SPBC725.10    | similar to peripheral-type benzodiazepine receptor; 3 predicted transmembrane helices; no apparent <i>S. cerevisiae</i> ortholog; non-essential (PMID 12618370)                                                                                                               |
| SPBC36.04     | cysteine synthase (PMID 14981292); similar to <i>S. cerevisiae</i> YGR012W                                                                                                                                                                                                    |
| SPCC1020.10   | serine/threonine protein kinase Oca2 (predicted); similar to <i>S. cerevisiae</i> YNL183C and YOR267C and YDL025C and YDL214C; non-essential (PMID 15821139)                                                                                                                  |
| SPAC227.01c   | EXS family protein; similar to <i>S. cerevisiae</i> YDR414C; 4 predicted transmembrane helices                                                                                                                                                                                |
| SPBC660.11    | single-stranded telomeric binding protein Tgc1 (PMID 12519786); rrm RNA recognition motif; functionally complements <i>S. cerevisiae</i> cdc13-1 (PMID 12519786); similar to <i>N. crassa</i> NCU07734.1; no apparent <i>S. cerevisiae</i> ortholog (cannot be distinguished) |
| SPCC757.10    | endoplasmic reticulum membrane involved in assembly of the V-ATPase; similar to <i>S. cerevisiae</i> YKL119C                                                                                                                                                                  |
| SPBC106.17c   | homoserine O-acetyltransferase (predicted); abhydrolase family; non-essential (PMID 12618370); deletion could not be obtained (PMID 12618370); similar to <i>S. cerevisiae</i> YNL277W                                                                                        |
| SPAC23E2.01   | iron-sensing transcription factor Fep1; zinc finger protein; zf-GATA type; expression constitutive irrespective of the nitrogen source (PMID 8799335); no apparent <i>S. cerevisiae</i> ortholog (cannot be distinguished)                                                    |
| SPAC19A8.11c  | sequence orphan                                                                                                                                                                                                                                                               |
| SPBC30D10.13c | pyruvate dehydrogenase e1 component (beta subunit); similar to <i>S. cerevisiae</i> YBR221C                                                                                                                                                                                   |
| SPCC736.07c   | sequence orphan                                                                                                                                                                                                                                                               |
| SPAC4D7.06c   | siroheme synthase (predicted); similar to <i>S. cerevisiae</i> YBR213W                                                                                                                                                                                                        |
| SPBC428.02c   | branched chain amino acid aminotransferase Eca49; non-essential (PMID 12618370); similar to <i>S. cerevisiae</i> YHR208W and YJR148W                                                                                                                                          |

---

---

|              |                                                                                                                                                                                                                       |
|--------------|-----------------------------------------------------------------------------------------------------------------------------------------------------------------------------------------------------------------------|
| SPBP8B7.22   | HDEL receptor; similar to <i>S. cerevisiae</i> YBL040C; 6 predicted transmembrane helices; predicted N-terminal signal sequence                                                                                       |
| SPAC25B8.05  | pseudouridylate synthase (predicted); similar to <i>S. cerevisiae</i> YFL001W                                                                                                                                         |
| SPAC22G7.07c | mRNA (N6-adenosine)-methyltransferase (predicted); conserved eukaryotic protein; similar to <i>S. cerevisiae</i> YGL192W                                                                                              |
| SPCC1281.04  | pyridoxal reductase (predicted); aldo/keto reductase family 8; similar to <i>S. pombe</i> SPAC9E9.11; similar to <i>S. cerevisiae</i> YPR127W                                                                         |
| SPAC13G7.06  | phosphoadenosine phosphosulfate reductase; similar to <i>S. cerevisiae</i> YPR167C                                                                                                                                    |
| SPBC16C6.01c | lysine methyltransferase (predicted); SET domain; no apparent <i>S. cerevisiae</i> ortholog                                                                                                                           |
| SPAC20H4.07  | RecA family ATPase Rhp57; RecA family; AAA family ATPase; helix-hairpin-helix (inferred from context); involved in the stimulation of Rad51 (Rhp51) mediated strand exchange; similar to <i>S. cerevisiae</i> YDR004W |
| SPBC25D12.06 | RNA helicase (predicted); similar to <i>A. thaliana</i> RH22; no apparent <i>S. cerevisiae</i> ortholog                                                                                                               |
| SPAC1071.11  | NADH-dependent oxidoreductase (predicted); no apparent <i>S. cerevisiae</i> ortholog                                                                                                                                  |
| SPAC17H9.13c | glutamate 5-kinase (predicted); PUA domain; similar to <i>S. cerevisiae</i> YDR300C and YHR033W                                                                                                                       |
| SPAC30.02c   | elongator associated protein (predicted); similar to <i>S. cerevisiae</i> YKL110C                                                                                                                                     |
| SPAC29B12.08 | sequence orphan; serine/proline-rich protein                                                                                                                                                                          |
| SPAC23H3.13c | heterotrimeric G protein alpha-2 subunit Gpa2 (PMID 1340462); similar to <i>S. cerevisiae</i> YER020W                                                                                                                 |
| SPAC959.07   | 40S ribosomal protein S04; similar to <i>S. cerevisiae</i> YJR145C and YHR203C                                                                                                                                        |
| SPCC1259.01c | 40S ribosomal protein S18; similar to <i>S. cerevisiae</i> YDR450W and YML026C                                                                                                                                        |
| SPAC1F7.13c  | 60S ribosomal protein L2A; similar to <i>S. cerevisiae</i> YFR031C-A and YIL018W                                                                                                                                      |
| SPAC29B12.04 | pyridoxine biosynthesis protein; similar to <i>S. cerevisiae</i> YMR096W and YFL059W and YNL333W                                                                                                                      |
| SPCC24B10.06 | glycoprotein (predicted); possibly <i>S. pombe</i> specific; GPI anchored protein (predicted) (PMID 12845604) (pers. comm. Birgit Eisenhaber); predicted N-terminal signal sequence                                   |
| SPCC24B10.21 | triosephosphate isomerase; similar to <i>S. cerevisiae</i> YDR050C                                                                                                                                                    |
| SPAPB1E7.02c | DNA polymerase alpha accessory factor Mcl1; WD repeat protein; essential (PMID 15643072); non-essential (PMID 15915339); similar to <i>S. cerevisiae</i> YPR135W                                                      |
| SPCC285.10c  | hypothetical protein; similar to <i>S. cerevisiae</i> YMR171C and YKL124W; SPRY domain; predicted N-terminal signal sequence                                                                                          |
| SPAC22F3.10c | glutamate--cysteine ligase Gcs1 (PMID 8619315); similar to <i>S. cerevisiae</i> YJL101C                                                                                                                               |

---

Constitutive screen

---

|               |                                                                                                                                                                                                                      |
|---------------|----------------------------------------------------------------------------------------------------------------------------------------------------------------------------------------------------------------------|
| SPAC1D4.06c   | cyclin-dependent kinase activating kinase Csk1 (PMID 9857180); similar to <i>S. cerevisiae</i> YKL139W; non-essential (PMID 8467814)                                                                                 |
| SPAC513.03    | M-factor precursor (PMID 8196631); pheromone; no apparent orthologs                                                                                                                                                  |
| SPBC13G1.08c  | Ash2-trithorax family protein; SPRY domain; zinc finger protein; zf-PHD finger; non-essential (PMID 12488447); similar to <i>S. cerevisiae</i> YLR015W                                                               |
| SPBC119.06    | copper chaperone Sco1; similar to <i>S. cerevisiae</i> YBR037C and YBR024W                                                                                                                                           |
| SPAC3G9.15c   | conserved eukaryotic protein; similar to <i>S. cerevisiae</i> YLR051C                                                                                                                                                |
| SPBC354.09c   | protease (predicted); peptidase family M28; similar to transferrin receptor protein; PA (protease associated) domain; similar to <i>S. cerevisiae</i> YJR126C and YPL176C and YOR256C; non-essential (PMID 12618370) |
| SPAC8E11.07c  | tubulin specific chaperone (cofactor A) (PMID 10978278); non-essential (PMID 10978278); similar to <i>S. cerevisiae</i> YOR265W                                                                                      |
| SPAP27G11.11c | dubious; unusual amino acid sequence; below 100 amino acid size threshold                                                                                                                                            |

---

---

|               |                                                                                                                                                                                                                                                                |
|---------------|----------------------------------------------------------------------------------------------------------------------------------------------------------------------------------------------------------------------------------------------------------------|
| SPCC1393.13   | conserved eukaryotic protein; DUF89; similar to <i>S. cerevisiae</i> YMR027W; similar to <i>S. pombe</i> SPAC806.04C (paralog)                                                                                                                                 |
| SPBC713.07c   | vacuolar polyphosphatase (predicted); similar to <i>S. cerevisiae</i> YDR452W; predicted N-terminal signal sequence                                                                                                                                            |
| SPBC36.07     | RNA polymerase II (elongator subunit) (predicted); disease associated, familial dysautonomia; similar to <i>S. cerevisiae</i> YLR384C                                                                                                                          |
| SPBC17A3.10   | zinc finger protein; pex2/pex 12 family; zf- C3HC4 type (RING finger); ubiquitin-protein ligase (E3) (predicted); similar to <i>S. cerevisiae</i> YDR265W                                                                                                      |
| SPAC13G6.14   | diadenosine 5',5'''-p1,p6-hexaphosphate hydrolase Aps1 (PMID 10090752); dual function MutT hydrolase; non-essential (PMID 12387729); deletion mutant results in decreased in vitro Ap6A hydrolase activity (PMID 12387729); degrades PP-InsP5 (PMID 12387729); |
| SPCC1450.07c  | D-amino acid oxidase (predicted); no apparent <i>S. cerevisiae</i> ortholog                                                                                                                                                                                    |
| SPAC4F10.04   | protein phosphatase type 2A, intrinsic regulator (predicted); similar to <i>S. cerevisiae</i> YIL153W                                                                                                                                                          |
| SPAC637.07    | translation initiation factor eIF3d Moe1; no apparent <i>S. cerevisiae</i> ortholog                                                                                                                                                                            |
| SPAC16E8.05c  | sequence orphan; transcriptionally regulated by Mei4                                                                                                                                                                                                           |
| SPAC19G12.15c | trehalose-6-phosphate phosphatase Tpp1; glycosyl transferase family 20; similar to <i>S. pombe</i> SPAC3G6.09C; similar to <i>S. cerevisiae</i> YDR074W                                                                                                        |
| SPAC1B3.03c   | cyclophilin; TPR repeat protein (inferred from context); induced by heat shock; peptidyl-prolyl cis-trans isomerase; similar to <i>S. cerevisiae</i> YLR216C and YJR032W                                                                                       |
| SPCC338.14    | adenosine kinase (predicted); similar to <i>S. cerevisiae</i> YJR105W                                                                                                                                                                                          |
| SPAC24H6.06   | pre-initiation complex subunit Sld3 (PMID 12006645); interacts physically with MCM proteins (PMID 12006645); similar to <i>S. cerevisiae</i> YGL113W                                                                                                           |
| SPAC22F8.12c  | sequence orphan; serine-rich protein; predicted N-terminal signal sequence                                                                                                                                                                                     |
| SPAC21E11.06  | translation initiation factor eIF2B delta subunit; similar to <i>S. cerevisiae</i> YGR083C                                                                                                                                                                     |

---

TABLE S2. Mutants identified in both screens

| <i>S. pombe</i><br>Systematic<br>Name | <i>S. pombe</i><br>Standard<br>Name | <i>S. cerevisiae</i><br>ortholog(s)         | <i>S. cerevisiae</i><br>Standard<br>Name | Product                                                                                                                    | Is the gene<br>inactivated<br>with KAN? | Is the phenotype<br>linked to KAN<br>knockout? |
|---------------------------------------|-------------------------------------|---------------------------------------------|------------------------------------------|----------------------------------------------------------------------------------------------------------------------------|-----------------------------------------|------------------------------------------------|
| Uninducible                           |                                     |                                             |                                          |                                                                                                                            |                                         |                                                |
| spbc16c6.01c                          |                                     | none apparent                               |                                          | lysine methyltransferase *                                                                                                 | no                                      | yes                                            |
| spbc27b12.11c                         | Pho7                                | none apparent                               |                                          | zinc finger domain - transcription factor *                                                                                | yes                                     | yes                                            |
| spac2f7.08c                           | Snf5                                | YBR289W                                     | Snf5                                     | SWI/SNF complex subunit Snf5                                                                                               | yes                                     | yes                                            |
| spac3a11.07                           |                                     | YMR145C,<br>YDL085W,<br>YML120C             | Nde1                                     | NADH dehydrogenase                                                                                                         | yes                                     | not determined                                 |
| spbc27.08c                            | Sua1                                | YJR010W                                     | Met3                                     | sulfate adenylyltransferase                                                                                                | no                                      | yes                                            |
| spcc1020.10                           | Oca2                                | YNL183C,<br>YOR267C,<br>YDL025C,<br>YDL214C | Npr1                                     | serine/threonine protein kinase Oca2 *                                                                                     | yes                                     | no                                             |
| spac1782.11                           | Met14                               | YKL001C                                     | Met14                                    | adenylyl-sulfate kinase *                                                                                                  | no                                      | yes                                            |
| spbc106.10                            | Pka1                                | YJL164C,<br>YPL203W,<br>YKL166C             | Tpk1                                     | cAMP-dependent protein kinase catalytic<br>subunit Pka1                                                                    | yes                                     | yes                                            |
| spac13a11.05                          |                                     | none apparent                               |                                          | peptidase family M17                                                                                                       | no                                      | yes                                            |
| spac1071.04c                          | Spc2                                | YML055W                                     | Spc2                                     | signal peptidase subunit Spc2 *                                                                                            | yes                                     | yes                                            |
| spbc725.10                            |                                     | none apparent                               |                                          | tspO homolog/ peripheral benzodiazepine<br>receptor homolog, involved in the transport<br>cytoplas/mitochondrial of haem * | yes                                     | not determined                                 |
| spac1071.11                           |                                     | none apparent                               |                                          | NADH-dependent flavin oxidoreductase *                                                                                     | yes                                     | no                                             |
| spbc8e4.05c                           |                                     | none apparent                               |                                          | fumarate lyase superfamily                                                                                                 | yes                                     | no                                             |
| spac13g7.06                           | Met16                               | YPR167C                                     | Met16                                    | phosphoadenosine phosphosulfate reductase                                                                                  | yes                                     | yes                                            |
| spac9.02c                             |                                     | YDR071C                                     | Paa1                                     | polyamine N-acetyltransferase *                                                                                            | yes                                     | no                                             |
| spac23h3.13c                          | Gpa2                                | YER020W                                     | Gpa2                                     | heterotrimeric G protein alpha-2 subunit<br>Gpa2                                                                           | yes                                     | yes                                            |
| spcc757.10                            | Vph2                                | YKL119C                                     | Vph2                                     | endoplasmic reticulum membrane protein<br>involved in assembly of the V-ATPase *                                           | yes                                     | yes                                            |
| spbc3B9.11c                           | Ctf1                                | YGL044C                                     | Rna15                                    | mRNA cleavage and polyadenylation                                                                                          | yes                                     | yes                                            |

|               |       |                     |       |                                                                           |     |                |
|---------------|-------|---------------------|-------|---------------------------------------------------------------------------|-----|----------------|
| spac4c5.02c   | Ryh1  | YLR262C             | Ypt6  | specificity factor complex subunit Ctf1                                   |     |                |
| spac4f10.04   |       | YIL153W             | Rrd1  | GTPase Ryh1                                                               | yes | yes            |
| spbc25d12.06  |       | none apparent       |       | protein phosphatase type 2A, intrinsic regulator *                        | yes | yes            |
| spbc1271.05c  |       | YOR052C             |       | RNA helicase *                                                            |     | no             |
| spac17h9.04c  |       | YDL167C             | Nrp1  | zf-AN1 type zinc finger protein                                           | yes | not determined |
|               |       |                     |       | RNA-binding protein                                                       | yes | yes            |
| Constitutive  |       |                     |       |                                                                           |     |                |
| spcc338.14    |       | YJR105W             | Ado1  | adenosine kinase *                                                        | yes | yes            |
| spap27g11.11c |       | none apparent       |       | dubious; unusual amino acid sequence- below 100 amino acid size threshold | yes | no             |
| spbp8b7.22    | Erd2  | YBL040C             | Erd2  | HDEL receptor                                                             | no  | yes            |
| spcc1393.13   |       | YMR027W             |       | DUF89 family protein                                                      | yes | yes            |
| spbc24c6.05   | Sec28 | YIL076W             | Sec28 | coatomer epsilon subunit *                                                | yes | yes            |
| spac1d4.06c   | Csk1  | YKL139W             | Ctk1  | cyclin-dependent kinase activating kinase Csk1                            | yes | yes            |
| spcc285.09c   | Cgs2  | YGL248W             | Pde1  | cAMP-specific phosphodiesterase Cgs2                                      | yes | not determined |
| spbc713.07c   |       | YDR452W             | Ppn1  | vacuolar polyphosphatase *                                                | yes | yes            |
| spac13g6.14   | Aps1  | YOR163W             | Ddp1  | diadenosine 5',5'''-p1,p6-hexaphosphate hydrolase Aps1                    | yes | yes            |
| spac1b3.03c   | Wis2  | YLR216C,<br>YJR032W | Cpr6  | cyclophilin family peptidyl-prolyl cis-trans isomerase Wis2               | yes | no             |
| * = predicted |       |                     |       |                                                                           |     |                |



TABLE S3. Primers used in this study.

| Primer                                        | Sequence                                                                             | Purpose           |
|-----------------------------------------------|--------------------------------------------------------------------------------------|-------------------|
| <b>Delete <i>pho1</i><sup>+</sup> (DP55)</b>  |                                                                                      |                   |
| DWO21                                         | ctgcttctttggttacaaccCACAGGAAACAGCTATGACC<br>GGTCATAGCTGTTTCCTGTGggttgtaaccaagaagcag  |                   |
| DWO22                                         | gcatttacaagtcgtacgcgtatg                                                             |                   |
| DWO23                                         | ggataaacagcagccacagcGTTGTAAAACGACGGCCAGT<br>ACTGGCCGTCGTTTTACAACgctgtggctgctgtttatcc |                   |
| DWO24                                         | gtgcacgtataggtttgtac                                                                 |                   |
| <b>Delete <i>snf5</i><sup>+</sup> (DP82)</b>  |                                                                                      |                   |
| O400                                          | ctttacttttttttaaatct <b>CGGATCCCCGGGTTAATTAA</b>                                     | core 5'           |
| O401                                          | gataaagattcttccaaaattgta <b>GAATTCGAGCTCGTTTAA<br/>AC</b>                            | core 3'           |
| O402                                          | cttcacgtcctatgaacctac                                                                | 5'end homology 5' |
| O403                                          | TTAATTAACCCGGGATCCGagatttaaaaaaaagtaaag                                              | 5'end homology 3' |
| O404                                          | GTTTAAACGAGCTCGAATTCtacaattttggaagaatctttat<br>c                                     | 3'end homology 5' |
| O405                                          | gcaaagatgaatttaacgag                                                                 | 3'end homology 3' |
| O406                                          | gttatttacaacttcccgtc                                                                 | Chk primer 500 bp |
| <b>Delete <i>pho7</i><sup>+</sup> (DP81)</b>  |                                                                                      |                   |
| O393                                          | CATATTTCTTTTGTCTTTTCGTTTGT <b>CGGATCCCCGG<br/>GTTAATTAA</b>                          | core 5'           |
| O394                                          | gaaaaacaaaggtaatatgcgcaaaa <b>GAATTCGAGCTCGTT<br/>TAAAC</b>                          | core 3'           |
| O395                                          | gtaccaagttgttgatcataaagg                                                             | 5'end homology 5' |
| O396                                          | ttaattaaccggggatccgacaaaagacaaaagaaat<br>g                                           | 5'end homology 3' |
| O397                                          | GTTTAAACGAGCTCGAATTCttttgcatattacctttgtttt<br>c                                      | 3'end homology 5' |
| O398                                          | catctgtacgatcacatttatcc                                                              | 3'end homology 3' |
| O399                                          | cgacttcgcctaacacgat                                                                  | Chk primer 500 bp |
| <b>Delete <i>asp1</i><sup>+</sup> (DP102)</b> |                                                                                      |                   |
| O831                                          | AAGCGTTATTAAATATTTTAAACGTAGTTGAATAA<br>TAAAGG <b>CGGATCCCCGGGTTAATTAA</b>            | core 5'           |
| O832                                          | GTTATCAAACATTCGTAAAAAGGGTAAAAGCGG<br>TTAATT <b>GAATTCGAGCTCGTTTAAAC</b>              | core 3'           |
| O833                                          | GCTTTTACCCTTTTACGAATG                                                                | 3' homology 5'    |
| O834                                          | GAATCATTTTGGCGCCAAGCACC                                                              | 3' homology 3'    |
| O835                                          | CATAGAAGCATTACTGCGAAAC                                                               | check primer      |
| O780                                          | TTAATTAACCCGGGATCCG                                                                  | Pringle Chk       |

|       |                             | Confirming deletion of genes / qPCR<br>primers |
|-------|-----------------------------|------------------------------------------------|
| O444  | G AAT ATG GAA ACA ATG CAC C | <i>pho7<sup>+</sup></i> (ZnFinger)             |
| O445  | GAATCGGCTTGGTTTTGATGGAAG    |                                                |
| O448  | GAGTTTTGACTCACTAAACG        | <i>snf5<sup>+</sup></i>                        |
| O449  | CTCATTAAATGCAATCATGACAAC    |                                                |
| O450  | GCTGCTAAGCCAGGAGATG         | SPAC13A11.05                                   |
| O451  | CCGCTGTACAACAACCAC          |                                                |
| O452  | GTCTTCCAGCTATATGCTG         | SPBC25D12.06                                   |
| O453  | CTTAACCAGTACTCCATCAG        |                                                |
| O505  | GGT GAT AAG TCC GAG ACT GCC | SPAC1B3_03c                                    |
| O506  | GTTACCAGCCTTAGCAAGTGC       |                                                |
| O507  | GGT TTA GTA GTC GAT GAA TAC | SPAC3A11_07                                    |
| O508  | GTTACGCAAGGAGTATAATTC       |                                                |
| O509a | GGCTGATGAATCTGTTCAGCA       | SPAC13G6_14                                    |
| 510a  | GCTTCCTCATCTCTGGGTAAT       |                                                |
| O511  | GCT CAG AAG TTT GGT GAG AAG | SPAC13G7_06                                    |
| O512  | CCAACGTCCGGCACGTTTCATC      |                                                |
| O513  | GGT TGT GGA TAT CAC AAT TTC | SPAC17H9_04c                                   |
| O514  | CATATTAGAGTAATGCGGAGC       |                                                |
| O515  | GGC CTC GCA TTT GGC ATT GAG | SPAC1071_04c                                   |
| O516  | GTACTTTGAAATTTCCGCCTC       |                                                |
| O517  | CGA GTA ATC GTT CAT CTT CTG | SPAC1071_11                                    |
| O518  | GGATGTGCTGCAGTAGTTCCG       |                                                |
| O519  | CCT ATT TCA TGC GTT TAC ATC | SPBC8E4_05c                                    |
| O520  | GTAATTTGTAACCTGGCGCTC       |                                                |
| O521  | CCA ACT ACA TAC GCA AAT GAC | SPBC16C6_01c                                   |
| O522  | GACTAAACGAGACCTATTCTC       |                                                |
| O523  | GCT CAG GAA ATC GGT ATC ACC | SPBC27_08c                                     |
| O524  | GTTTACGGTAGTCCACTCAGC       |                                                |
| O525  | GAT TAT TTA GCC CCG GAA ATC | SPBC106_10                                     |
| O526  | CGTAGCTACATCAGCATAAGC       |                                                |
| O527  | CAG TCT CAA TCA GAT TAT GAG | SPBC713_07c                                    |
| O528  | GCCACTCTGTAATTTGAATTG       |                                                |
| O529  | GCT TCT CTC GTT CCA GTC GCC | SPBC725_10                                     |
| O530  | GGAAGCCGTTGGTGCAAGAGG       |                                                |
| O531  | GCT GAT TAT GGC ATT ATC CAC | SPBC1271_05c                                   |
| O532  | GCAATCATGATCTTCCATAAG       |                                                |
| O533  | CCC TAT ATC ATG AAT CTT AGC | SPCC338_14                                     |
| O534  | GCCGCTAACCTTGATGCATTC       |                                                |
| O535  | GAT CCT CGT GCA GTG GAT ATC | SPCC1020_10                                    |
| O536  | CATATGGCACATCGAAATATC       |                                                |
| O537  | ACT TTC GAC TTT CCC AGA TTG | SPAC1D4_06c-intronsx2                          |

|             |                              |                                                                        |
|-------------|------------------------------|------------------------------------------------------------------------|
| O538        | GCAGATACTTTAGGGAATGAC        |                                                                        |
| O539a       | G CAA GTG ACT CAA GAA GAA GG | SPAC4C5_02c-intronsx3                                                  |
| O540a       | GCTTTCATTCTCGTTAGGCTG        |                                                                        |
| O541        | GAC TTT GGT ACG GGT CAT GAG  | SPAC4F10_04-intron                                                     |
| O542        | GACCTTTGACCATATAGGAAC        |                                                                        |
| O543        | CTT GAC TTC TAG AAC AGG TAG  | SPAC9_02c-intron                                                       |
| O544        | CAAGTTTCATCCCCAAACTTG        |                                                                        |
| O545        | GAT CAT TTG CAA ATT CGA ATG  | SPAC23H3_13c-intron                                                    |
| O546        | CCGATTTATAGAAGGGTTCAC        |                                                                        |
| O547        | GCG TCT GGA AAG TCT ACA ATC  | SPAC1782_11-intron                                                     |
| O548        | CTTGTACAAACCCTTTGGATC        |                                                                        |
| O549a       | GTT TAA AAT TGA TTC ATA TTC  | SPAP27G11_11c-intron                                                   |
| O550a       | GGTTGATTTAATCCAATATTG        |                                                                        |
| O551        | CCG ACT TCT ATC CCA TTG GCC  | SPBC3B9_11c-intronsx2                                                  |
| O552        | CCGCTTCCCTTCATTGCCCTG        |                                                                        |
| O553        | CTG CTG AAC AGA CAT TGA AAC  | SPBC24C6_05-intron                                                     |
| O554        | GATCGTTCAACTTCAGTGTAG        |                                                                        |
| O555        | GTC TTG ATA CTT TTC GAA CTG  | SPBP8B7_22-intronsx2                                                   |
| O556        | CTGTTCCGGCGATATACGACTG       |                                                                        |
| O557        | CGT CGA ACC CGA TAT GGT AGC  | SPCC285_09c-intronsx2                                                  |
| O558        | GAACTTTTGGGAAGACAACGAC       |                                                                        |
| O559a       | CTA TGT GCG TTT TCA GCA ATC  | SPCC757_10-intron                                                      |
| O560a       | CTTCAAAGATGGAATGGCTCC        |                                                                        |
| O561        | CGA AGG ATG TAC CCT GGT TTG  | SPCC1393_13-intron                                                     |
| O562        | CAACGACGGCGTATTTACCAG        |                                                                        |
| <b>qPCR</b> |                              |                                                                        |
| O66         | ggtattcatgaggctacttacaac     | qPCR on <i>act1</i> <sup>+</sup> 5'                                    |
| O67         | ccgctctcatcatactcttgcttg     | qPCR on <i>act1</i> <sup>+</sup> 3'                                    |
| O69         | gctaatagccttgcaaattccctc     | qPCR on <i>pho1</i> <sup>+</sup> 5'                                    |
| O70         | ctagcattgcaaagagtgcaaag      | qPCR on <i>pho1</i> <sup>+</sup> 3'                                    |
| O72         | gatttgctgtttgttattgcc        | qPCR on <i>pho84</i> <sup>+</sup> 5'                                   |
| O73         | ccacttgctatcacattgaacttg     | qPCR on <i>pho84</i> <sup>+</sup> 3'                                   |
| O848        | CCTTGGACACTGATATTGGCG        | qPCR on <i>fbp1</i> <sup>+</sup> 5'                                    |
| O849        | TGAAATTAATATATTCCTCG         | qPCR on <i>fbp1</i> <sup>+</sup> 3'                                    |
| O850        | GAGTATGATGACGCTTGCTATTC      | qPCR on <i>isp6</i> <sup>+</sup> 5'                                    |
| O851        | CAGGAATAGACAAGAGTACATC       | qPCR on <i>isp6</i> <sup>+</sup> 3'                                    |
| O503        | GACATGGAGGCCCAAGATAAC        | For amplifying the NAT cassette to switch KAN to NAT in delete strains |
| O504        | TGGATGGCGGCGTTAGTATC         |                                                                        |

|      |                                                                                     | <b>Mating type check</b>                                              |
|------|-------------------------------------------------------------------------------------|-----------------------------------------------------------------------|
| MT1  | AGAAGAGAGAGTAGTTGAAG                                                                | Mtype for <i>Sz. pombe</i>                                            |
| MP   | ACGGTAGTCATCGGTCTTCC                                                                |                                                                       |
| MM   | TACGTTCAGTAGACGTAGTG                                                                |                                                                       |
|      |                                                                                     | <b>pUR18-YFP complementation<br/>plasmids</b>                         |
| O495 | catgcctgcaggtcgactctagaggatCCCCGGGTTA<br>ATTAAC <u>atgtctaaaggtgaagaatta</u>        | PCR YFP (5') to put into pUR18                                        |
| O496 | <u>cacaggaacagctatgaccatgattacgaattcgag</u><br><u>ctcggta</u> tatatattacccgtttatccc | PCR YFP (3') to put into pUR18                                        |
| O500 | <u>gccaagccttgcctgcaggtcgactctagaggat</u><br><u>CCCCGGGCCGTATACGATACTTTTAAC</u>     | PCR <i>pho7<sup>+</sup></i> (5') with no stop for YFP tag<br>in pUR18 |
| O502 | taattcttcacctttagacatTTGTCTAAAGGGATGA<br>TTC                                        | PCR <i>pho7<sup>+</sup></i> (3') with no stop for YFP tag<br>in pUR18 |
| O736 | gccaagccttgcctgcaggtcgactctagaggatATGGATAA<br>GGATATAGGCTCTGC                       | PCR <i>snf5<sup>+</sup></i> into pUR19YFP plasmid                     |
| O737 | taattcttcacctttagacatAGTATTTCTATCCAAAACC                                            |                                                                       |
